# Supplementary material for: A hierarchically porous sponge for stabilized emulsion separation with high filtration flux and separation efficiency
Source: Royal Society of Chemistry journal article supplement (doi:10.1039/d2ta01897g), 2022-01-01
Supplement: d2ta01897g2.pdf [file d2ta01897g2.pdf]

## Supporting Information

### **Hierarchically Porous Sponge for Stabilized Emulsion Separation with High Filtration Flux and Separation Efficiency**

*Jinfeng Cao, Wenyu Wang, and Shengyu Feng\**

*Key Laboratory of Special Functional Aggregated Materials & Key Laboratory of Colloid and Interface Chemistry (Shandong University), Ministry of Education; Shandong Key Laboratory of Advanced Organosilicon Materials and Technologies; School of Chemistry and Chemical Engineering, Shandong University, Jinan 250100, P. R. China*

*Jinfeng Cao, Wenyu Wang, and Shengyu Feng\**

*E-mail: fsy@sdu.edu.cn*

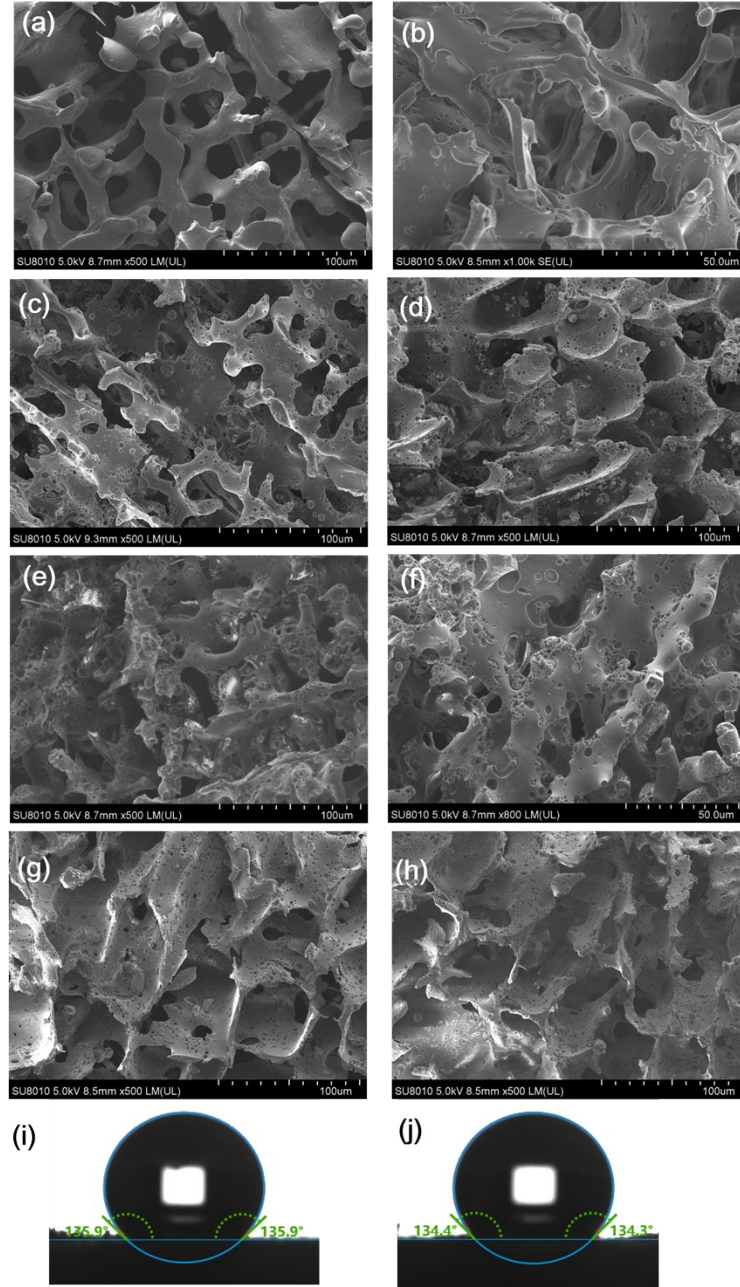

Figure S1. SEM of the (a) SS-H<sub>1</sub>, (b) SS-H<sub>2</sub>, (c) SS-H<sub>3</sub>, (d) SS-H, (e) SS-H<sub>4</sub>, (f) SS-H<sub>5</sub>, (g) SS-H after multiple compressions, (h) SS-H after multiple washing processes with ethanol. The images of water contact angle of the SS-H after multiple (i) compressions, and (j) washing processes with ethanol.

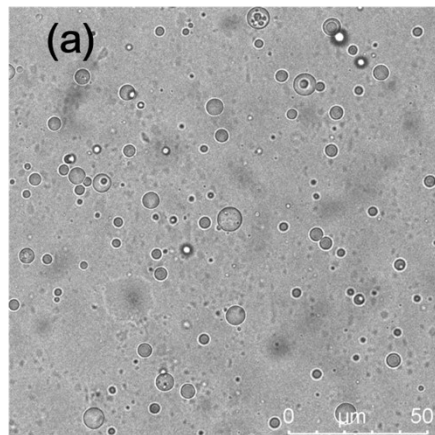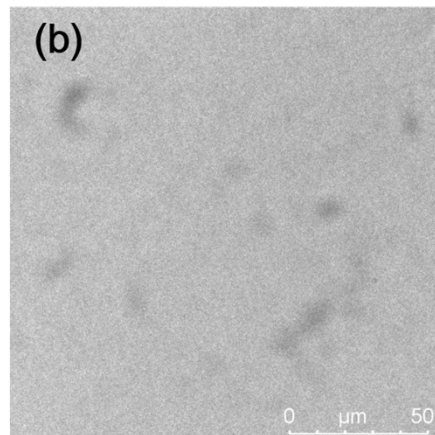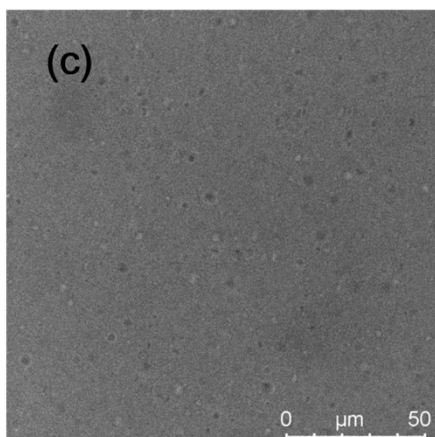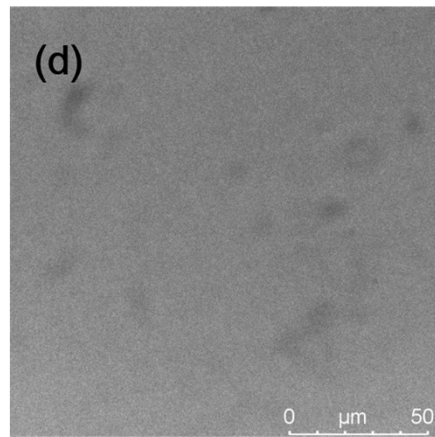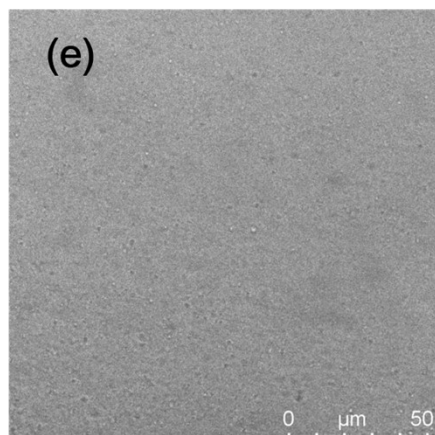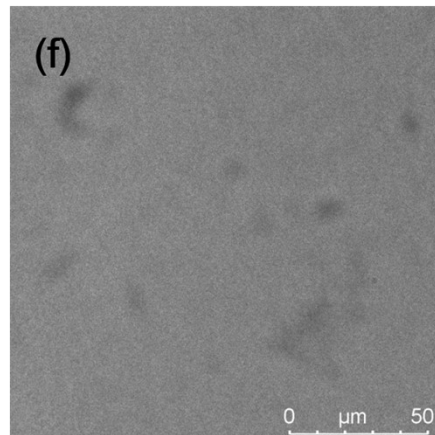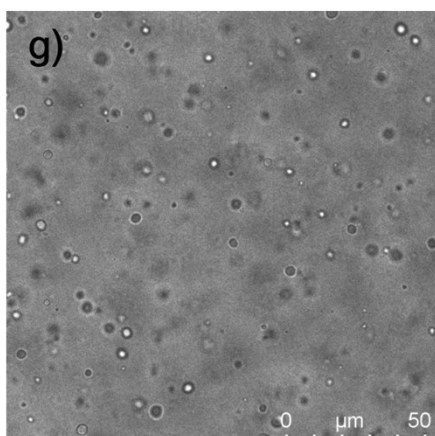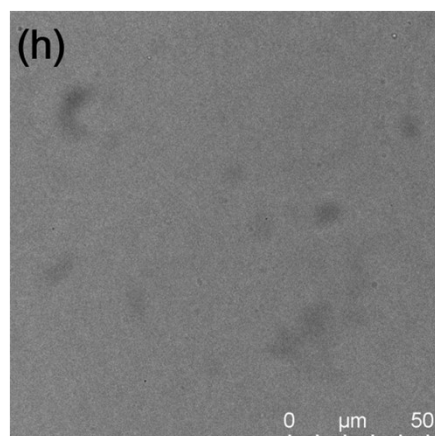

Figure S2. The optical microscope images of the chloroform-in-water emulsion (a) before and (b) after separation. The optical microscope images of the petroleum ether-in-water emulsion (c) before and (d) after separation. The optical microscope images of the kerosene-in-water emulsion (e) before and (f) after separation. The optical microscope images of the cyclohexane-in-water emulsion (g) before and (h) after separation.

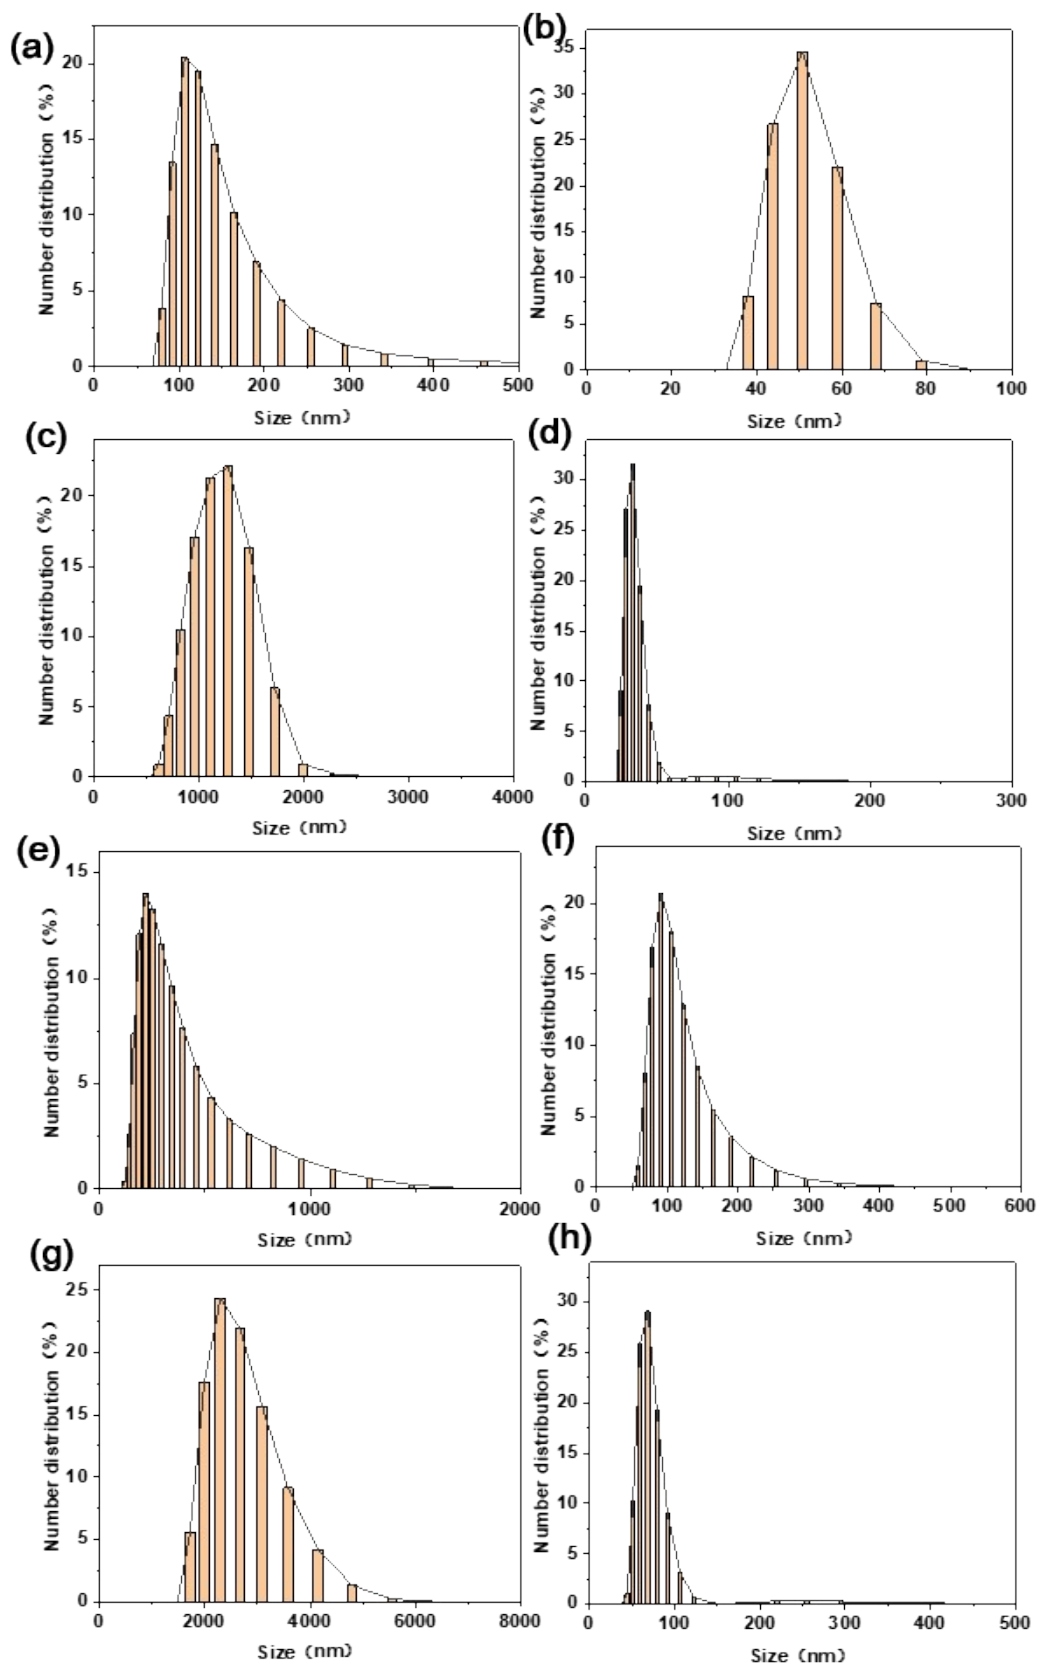

Figure S3. The emulsions size distribution obtained by dynamic light scattering of the chloroform-in-water emulsion (a) before and (b) after separation. The emulsions size distribution of the petroleum ether-in-water emulsion (c) before and (d) after separation. The emulsions size distribution of the kerosene-in-water emulsion (e) before and (f) after separation. The emulsions size distribution of the cyclohexane-in-water emulsion (g) before and (h) after separation.

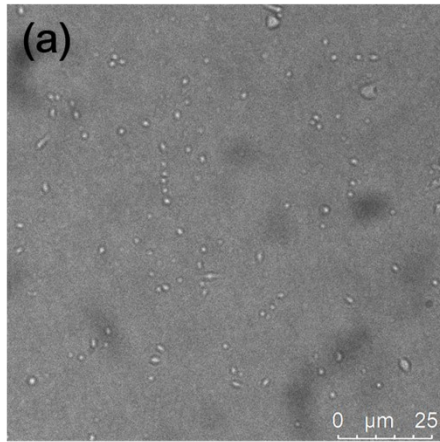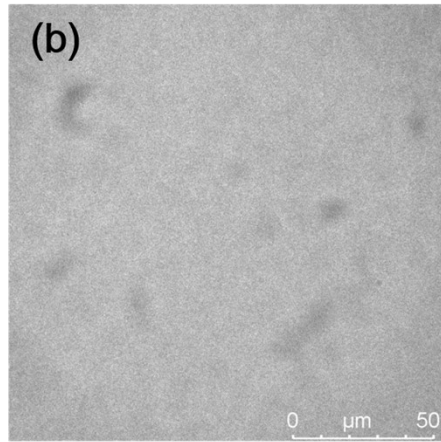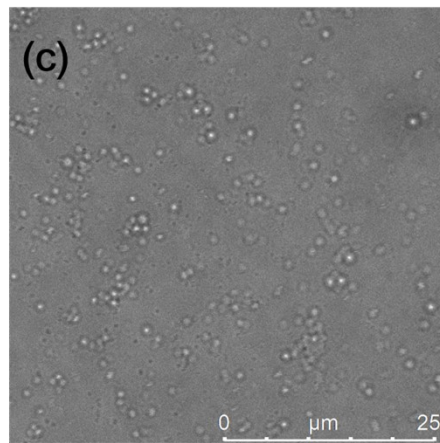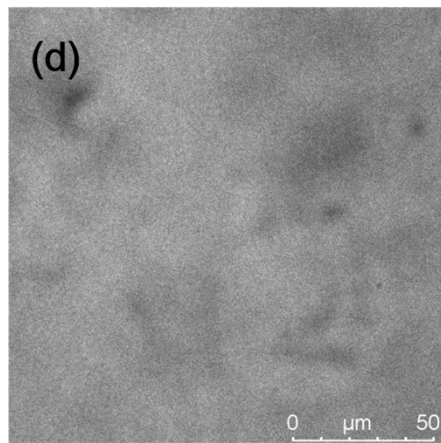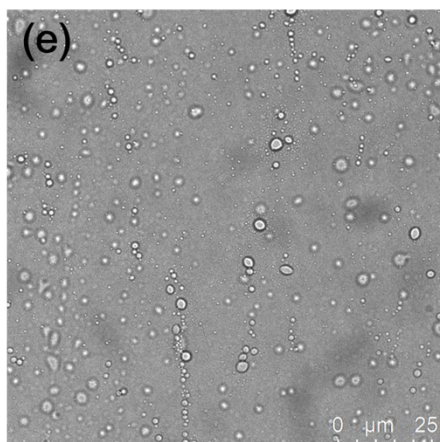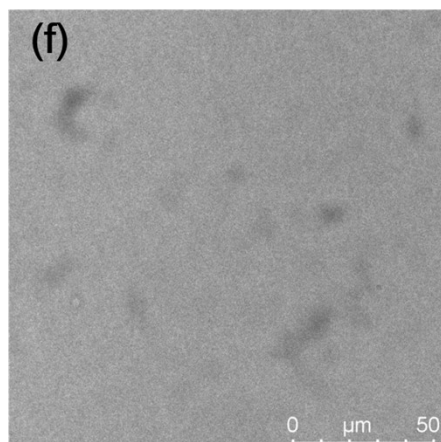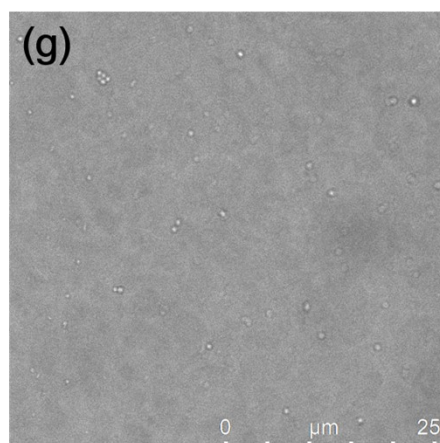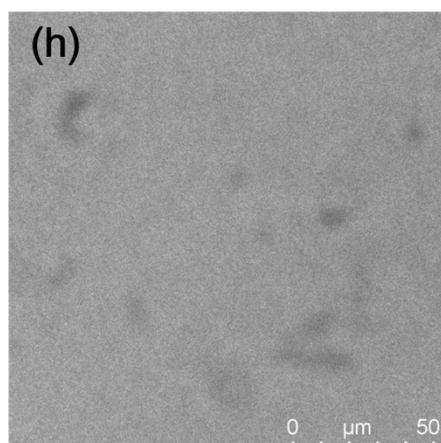

Figure S4. The optical microscope images of the water-in-chloroform emulsion (a) before and (b) after separation. The optical microscope images of the water-in-petroleum ether emulsion (c) before and (d) after separation. The optical microscope images of the water-in-kerosene emulsion (e) before and (f) after separation. The optical microscope images of the water-in-cyclohexane emulsion (g) before and (h) after separation.

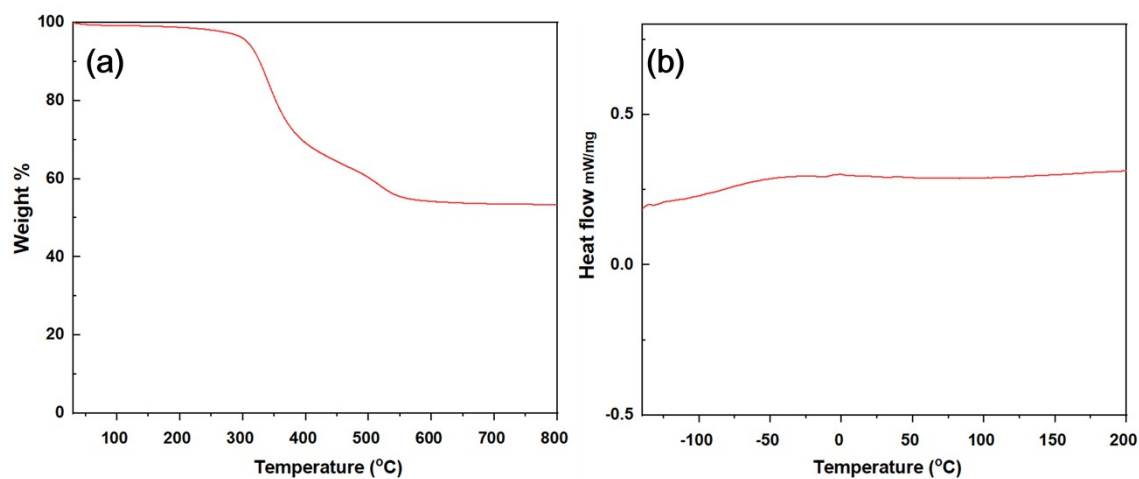

Figure S5. The TGA curve of the SS-H in air at 10 °C min<sup>-1</sup>. The DSC curve of the SS-H in N<sub>2</sub> at 10 °C min<sup>-1</sup>.
